# Supplementary material for: All‐Inorganic Perovskite Quantum Dot‐Monolayer MoS2 Mixed‐Dimensional van der Waals Heterostructure for Ultrasensitive Photodetector
Source: PubMed Central journal article supplement (PMC6299711; doi:10.1002/advs.201801219), 2018-09-21
Supplement: ADVS-5-1801219-s001.pdf [file ADVS-5-1801219-s001.pdf]

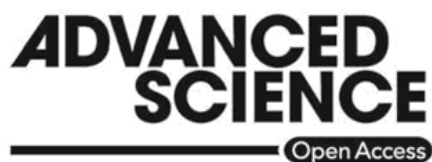

## Supporting Information

for *Adv. Sci.*, DOI: 10.1002/adv.201801219

All-Inorganic Perovskite Quantum Dot-Monolayer MoS<sub>2</sub>  
Mixed-Dimensional van der Waals Heterostructure for  
Ultrasensitive Photodetector

*Hualin Wu, Haonan Si, Zihan Zhang, Zhuo Kang,\* Pingwei  
Wu, Lixin Zhou, Suicai Zhang, Zheng Zhang, Qingliang Liao,  
and Yue Zhang\**

## Supporting Information

### **All-inorganic perovskite quantum dot-monolayer MoS<sub>2</sub> mixed dimensional van der Waals heterostructure for ultrasensitive photodetector**

*Hualin Wu, Haonan Si, Zihan Zhang, Zhuo Kang\*, Pingwei Wu, Lixin Zhou, Suicai Zhang, Zheng Zhang, Qingliang Liao, Yue Zhang\**

H. Wu, Dr. H. Si, Z. Zhang, Dr. Z. Kang, P. Wu, L. Zhou, S. Zhang, Dr. Z. Zhang, Prof. Q. Liao and Prof. Y. Zhang

State Key Laboratory for Advanced Metals and Materials, School of Materials Science and Engineering, University of Science and Technology Beijing, Beijing 100083, P. R. China.

Prof. Y. Zhang

Beijing Municipal Key Laboratory of New Energy Materials and Technologies, University of Science and Technology Beijing, Beijing 100083, P. R. China.

\*E-mail: [zhuokang@ustb.edu.cn](mailto:zhuokang@ustb.edu.cn) (Z. Kang), [yuezhang@ustb.edu.cn](mailto:yuezhang@ustb.edu.cn) (Y. Zhang)

**S1.** Photoluminescence spectra.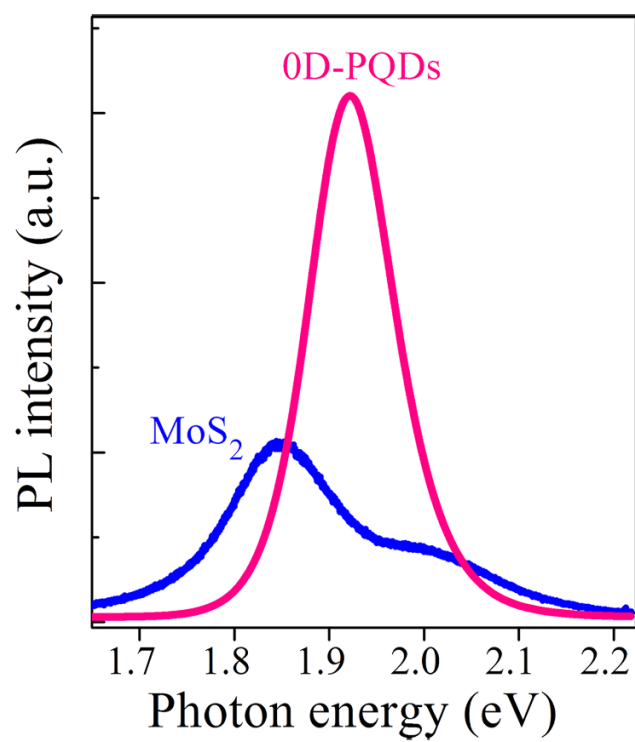**Figure S1.** Photoluminescence (PL) spectra of 0D-PQDs and monolayer MoS<sub>2</sub>.

**S2.** Current on-off ratio of the PQDs/MoS<sub>2</sub> MvdWH based phototransistor.

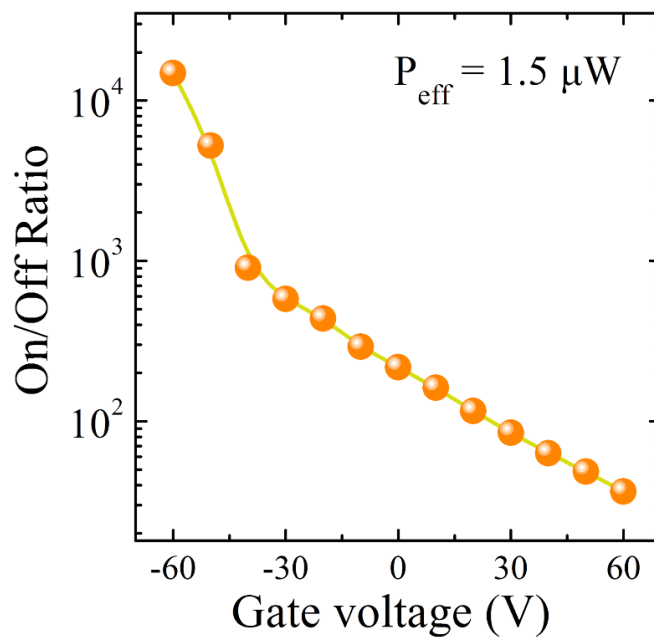

**Figure S2.** Current on-off ratio of the PQDs/MoS<sub>2</sub> MvdWH based phototransistor under 532 nm, 1.5  $\mu\text{W}$  illumination power.

**S3.** Output characteristics of the PQDs/MoS<sub>2</sub> MvdWH based phototransistor.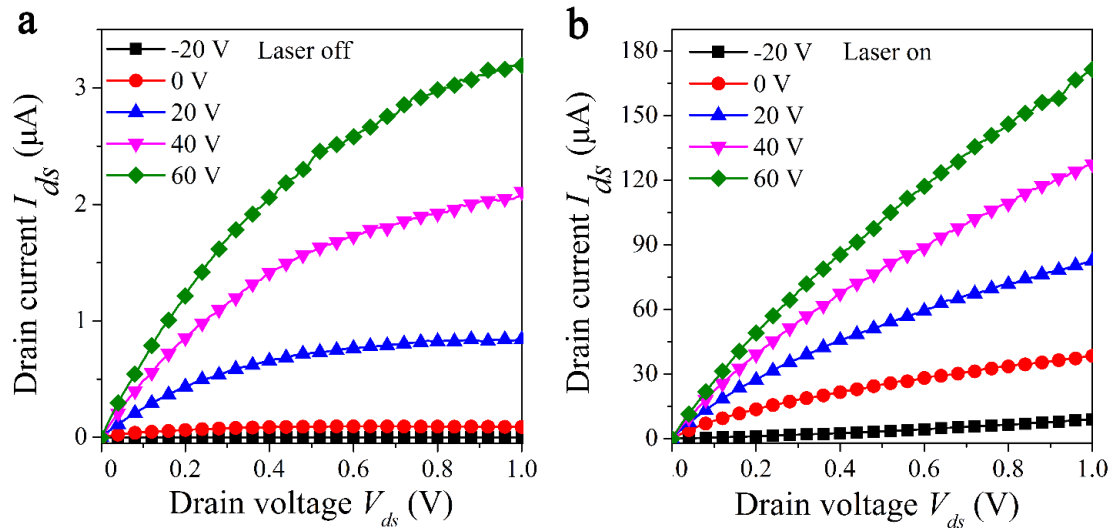

**Figure S3.** Output characteristics of the PQDs/MoS<sub>2</sub> MvdWH based phototransistor under a) dark and b) illumination ( $\lambda = 532$  nm and  $P = 1.5$   $\mu\text{W}$ ).

**S4.** Photogating effect modulated by the applied gate voltage.

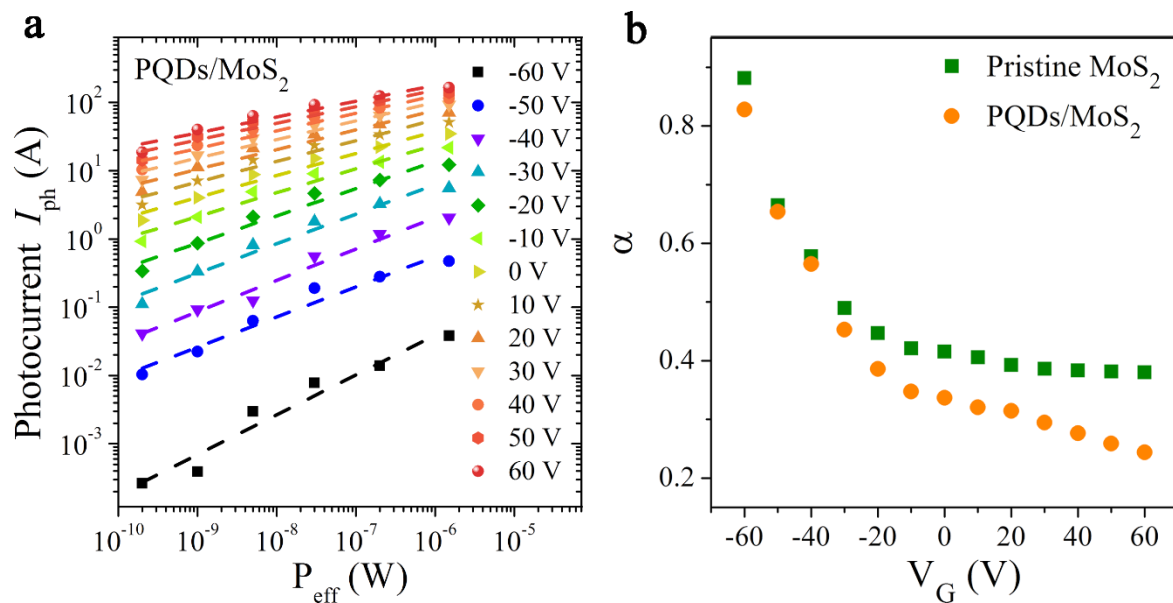

**Figure S4.** Photogating mechanism modulated by the applied gate voltage. a) Photocurrent versus efficient laser power at different back-gate voltages. b) Exponent  $\alpha$  at each gate voltage for the PQRs/MoS<sub>2</sub> and pristine MoS<sub>2</sub> devices, respectively.
